# Supplementary figures and images for: Clinical Significance of NKD Inhibitor of WNT Signaling Pathway 1 (NKD1) in Glioblastoma
Source: Hindawi journal article supplement (doi:10.1155/2023/1184101), 2023-03-17

A

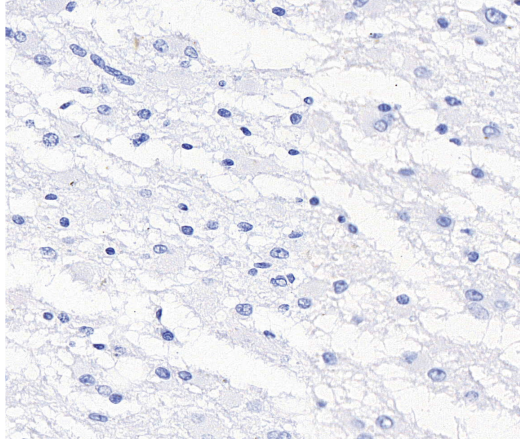

Low NKD1 immunoreactivity

B

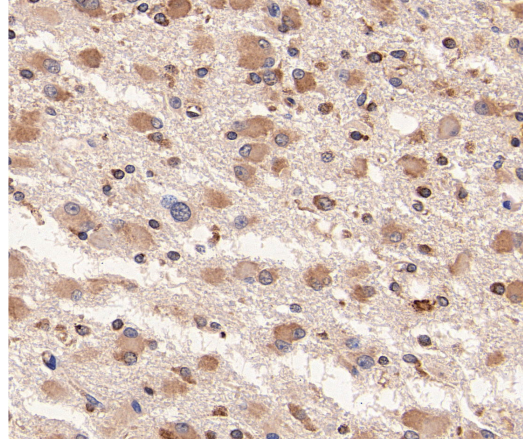

High NKD1 immunoreactivity

Supplement: f1 [file 1184101.f1.zip]
